# Supplementary material for: The effects of Saccharomyces boulardii on rat colonic hypermotility induced by repeated water avoidance stress and the potential mechanism
Source: PeerJ. 2022 Nov 22;10:e14390. doi: 10.7717/peerj.14390 (PMC9695494; doi:10.7717/peerj.14390)
Supplement: Data S4 [file peerj-10-14390-s004.xls]

## Sheet: Fecal pellets
DAYS	N1	N2	N3	N4	N5	N6	N7	N8	S1	S2	S3	S4	S5	S6	S7	S8	C1	C2	C3	C4	C5	C6	C7	C8
1	7	7	8	13	10	10	9	8	6	5	3	8	4	9	7	5	2	3	1	1	2	3	4	2
2	9	4	11	8	11	9	5	7	6	3	7	8	8	6	6	3	3	4	2	4	3	1	1	1
3	12	7	8	13	8	7	5	7	6	7	2	6	8	7	3	6	2	3	2	4	4	2	1	1
4	11	10	8	9	13	7	11	9	7	8	6	9	6	7	8	5	4	3	2	3	2	4	3	4
5	15	9	9	18	10	7	16	7	8	9	6	10	8	10	6	11	6	4	5	3	4	5	2	4
6	13	9	8	12	8	10	11	7	4	6	4	6	7	6	7	5	3	2	3	4	4	1	1	2
7	12	9	8	12	12	9	14	10	8	10	7	6	3	7	10	5	4	1	2	3	4	2	4	3
8	9	8	12	12	11	12	10	10	7	5	7	0	6	5	4	6	2	3	2	2	4	5	1	2
9	7	10	7	16	11	14	15	9	7	7	8	5	2	8	6	7	4	3	2	2	3	1	5	3
10	13	11	11	13	9	14	12	9	9	7	6	3	4	5	10	7	5	2	3	4	1	3	4	2

## Sheet: Amplification
In vivo CM（g)
0.42	1.18	0.67
0.43	1.37	0.72
0.49	1.44	0.8
0.5	2.11	0.84
0.6	2.16	0.88
0.61	2.64	0.94
In vivo LM（g)
0.2	0.67	0.43
0.23	0.72	0.49
0.26	0.78	0.53
0.34	1.06	0.58
0.3	1.26	0.62
0.45	1.5	0.63
in vitro CM(g)
normal	5mg	10mg	15mg
0.6	0.48	0.43	0.4
1.39	0.73	0.64	0.37
0.55	0.38	0.33	0.14
0.53	0.39	0.36	0.24
1.52	0.87	0.51	0.44
in vitro.LM(g)
normal	2.5mg	5mg	7.5mg
0.49	0.37	0.34	0.23
0.34	0.28	0.19	0.12
0.58	0.52	0.21	0.12
0.6	0.49	0.26	0.16
0.54	0.43	0.29	0.24

## Sheet: Hscore
Image	Num Detections	Num 1+	Num 2+	Num 3+	Num Negative	Positive %	H-score	Area μm^2
S1	1801	1049	630	4	118	93.45	128.87	603202
S2	1640	1049	552		39	97.62	131.28	603202
N3	2505	818	1630	4	53	97.88	163.27	603202
S4	2006	1094	838		74	96.31	138.09	603202
N4	2913	817	2062	4	30	98.97	170.03	603202
C6	2209	1702	394	1	112	94.93	112.86	603202
N1	2237	990	1160	2	85	96.2	148.23	603202
C2	2088	1589	171		328	84.29	92.48	603202
C5	2302	1789	356		157	93.18	108.64	603202
S3	1934	1055	763	16	100	94.83	135.94	603202
S5	2435	1150	1115	1	169	93.06	138.93	603202
N2	2168	1026	1113	2	27	98.75	150.28	603202
C1	2264	1717	53		494	78.18	80.52	603202
C3	2054	1744	94		216	89.48	94.06	603202
N5	1468	167	1254	43	4	99.73	191.01	603202
C4	1967	1297	413		257	86.93	107.93	603202
S6	1979	1018	873	6	82	95.86	140.58	603202
N6	2245	1073	1094		78	96.53	145.26	603202

## Sheet: RT-PCR
Experiment: ljw2022.1.12 Selected Filter: SYBR Green I / HRM Dye (465-510)
Include	Color	Pos	Name	Cp
TRUE	255	A1	GAPDH1	20.46
TRUE	255	A2	GAPDH2	20.97
TRUE	255	A3	GAPDH3	20.89
TRUE	255	A4	GAPDH4	20.29
TRUE	255	A5	GAPDH5	21.01
TRUE	255	A6	GAPDH6	20.12
TRUE	255	A7	GAPDH7	20.67
TRUE	255	A8	GAPDH8	21.76
TRUE	255	A9	GAPDH9	21.34
TRUE	255	B1	TLR41	27.91
TRUE	255	B2	TLR42	28.02
TRUE	255	B3	TLR43	28.92
TRUE	255	B4	TLR44	26.76
TRUE	255	B5	TLR45	27.32
TRUE	255	B6	TLR46	26.07
TRUE	255	B7	TLR47	28.08
TRUE	255	B8	TLR48	28.96
TRUE	255	B9	TLR49	27.97
TRUE	255	C1	TLR41(Repeated holes )	28.24
TRUE	255	C2	TLR42(Repeated holes )	28.21
TRUE	255	C3	TLR43(Repeated holes )	28.97
TRUE	255	C4	TLR44(Repeated holes	26.79
TRUE	255	C5	TLR45(Repeated holes )	27.57
TRUE	255	C6	TLR46(Repeated holes )	26.86
TRUE	255	C7	TLR47(Repeated holes )	27.98
TRUE	255	C8	TLR48(Repeated holes )	29.32
TRUE	255	C9	TLR49(Repeated holes )	28.08
			G1
			G2
			G3
			G4
			G5
			G6
			G7
			G8
			G9
			G10
			G11
			G12
			H1
			H2
			H3
			H4
			H5
			H6
			H7
			H8
			H9

## Sheet: IL-6
Sample number	Raw OD	Calibrated OD	Sample concentration（pg/ml)	concentration(mean)
C1	0.2205	0.1674	258.583				Original OD of standard	Standards calibration OD	Standard concentration（pg/ml)
	0.2179	0.1648	254.487	256.535			2.0933	2.0402	2000
S1	0.1049	0.0518	79.4553				1.1839	1.1308	1000
	0.1024	0.0493	75.6481	77.5517			0.676	0.6229	500
S2	0.1029	0.0498	76.4093				0.3664	0.3133	250
	0.1041	0.051	78.2367	77.323			0.2088	0.1557	125
S4	0.0562	0.0031	5.80097				0.1318	0.0787	62.5
	0.0591	0.006	10.1569	7.97895			0.099	0.0459	31.25
N5	1.5831	1.53	2825.24				0.0531	0	0
	1.6094	1.5563	2883.03	2854.14
S3	0.7944	0.7413	1237.3
	0.7967	0.7436	1241.52	1239.41
N4	1.8075	1.7544	3328.42
	1.8097	1.7566	3333.47	3330.94
N2	0.6911	0.638	1050.15
	0.6831	0.63	1035.86	1043
C4	0.0659	0.0128	20.3858
	0.0687	0.0156	24.6038	22.4948
N3	0.8175	0.7644	1279.81
	0.8237	0.7706	1291.26	1285.54
S5	0.2088	0.1557	240.178
	0.2136	0.1605	247.721	243.95
C2	0.1449	0.0918	140.754
	0.1466	0.0935	143.375	142.064
C5	0.2349	0.1818	281.319
	0.2401	0.187	289.552	285.436
N1	0.3555	0.3024	475.417
	0.3582	0.3051	479.838	477.628
C3	0.1211	0.068	104.194
	0.1232	0.0701	107.409	105.802
256.53	477.628	77.5517
142.06	1043	77.323
105.802	1285.54	1239.41
22.4948	3330.94	7.97895
285.436	2854.14	243.95
0.25653	0.477628	0.0775517
0.14206	1.043	0.077323
0.105802	1.28554	1.23941
0.0224948	3.33094	0.00797895
0.285436	2.85414	0.24395

## Sheet: IL-1b
Sample number	Raw OD	Calibrated OD	Sample concentration（pg/ml)	concentration(mean)
C1	0.0535	0.0091	31.9782
	0.0519	0.0075	26.5478	29.263
C2	0.1294	0.085	289.506				Original OD of standard	Standards calibration OD	Standard concentration（pg/ml)
	0.1309	0.0865	294.594	292.05			1.2287	1.1843	2000
S1	0.0613	0.0169	58.4503				0.6307	0.5863	1000
	0.0621	0.0177	61.1653	59.8078			0.339	0.2946	500
S2	0.0761	0.0317	108.675				0.2014	0.157	250
	0.0753	0.0309	105.961	107.318			0.1177	0.0733	125
S3	0.0509	0.0065	23.1538				0.0768	0.0324	62.5
	0.0517	0.0073	25.869	24.5114			0.0596	0.0152	31.25
N5	1.2224	1.178	3981.62				0.0444	0	0
	1.2153	1.1709	3957.74	3969.68
S4	0.2988	0.2544	863.745
	0.3019	0.2575	874.246	868.996
N4	1.0685	1.0241	3463.61
	1.0734	1.029	3480.12	3471.86
N2	0.4064	0.362	1228.11
	0.4124	0.368	1248.42	1238.26
N3	0.4944	0.45	1525.88
	0.4969	0.4525	1534.34	1530.11
C5	0.1341	0.0897	305.448
	0.1341	0.0897	305.448	305.448
C2	0.0842	0.0398	136.161
	0.0798	0.0354	121.231	128.696
S5	0.3077	0.2633	893.894
	0.3045	0.2601	883.054	888.474
N1	0.1529	0.1085	369.211
	0.1504	0.106	360.733	364.972
C4	0.0514	0.007	24.8508
	0.0522	0.0078	27.566	26.2084
29.263	364.972	59.8078
292.05	1238.26	107.318
128.696	1530.11	24.5114
26.2084	3471.86	868.996
305.448	3969.68	888.474
0.029263	0.364972	0.0598078
0.29205	1.23826	0.107318
0.128696	1.53011	0.0245114
0.0262084	3.47186	0.868996
0.305448	3.96968	0.888474

## Sheet: INF-r
Sample number	Raw OD	Calibrated OD	Sample concentration（pg/ml)	concentration(mean)
S1	0.0556	0.0137	18.1382
	0.0536	0.0117	15.4833	16.8107
S2	0.0554	0.0135	17.8725				Original OD of standard	Standards calibration OD	Standard concentration（pg/ml)
	0.0568	0.0149	19.7332	18.8029			1.7976	1.7557	2000
C1	0.0463	0.0044	5.83035				1.0803	1.0384	1000
	0.0469	0.005	6.62152	6.22593			0.6631	0.6212	500
C2	0.0625	0.0206	27.3316				0.3897	0.3478	250
	0.0656	0.0237	31.4791	29.4053			0.2196	0.1777	125
C3	0.0677	0.0258	34.2947				0.1243	0.0824	62.5
	0.0694	0.0275	36.5776	35.4361			0.0811	0.0392	31.25
N5	0.0949	0.053	71.2042				0.0419	0	0
	0.0955	0.0536	72.0276	71.6159
C4	0.0608	0.0189	25.0616
	0.0605	0.0186	24.6614	24.8615
N4	0.0745	0.0326	43.4454
	0.072	0.0301	40.0752	41.7603
N1	0.0974	0.0555	74.6377
	0.0979	0.056	75.3252	74.9814
N2	0.1266	0.0847	115.252
	0.1252	0.0833	113.283	114.268
N3	0.0656	0.0237	31.4791
	0.0667	0.0248	32.9533	32.2162
C5	0.0564	0.0145	19.2014
	0.0542	0.0123	16.2793	17.7403
S3	0.0582	0.0163	21.5962
	0.0566	0.0147	19.4673	20.5317
S5	0.0658	0.0239	31.747
	0.0667	0.0248	32.9533	32.3502
S4	0.0703	0.0284	37.7875
	0.0716	0.0297	39.5367	38.6621
6.22593	74.9814	16.8107
29.4053	114.268	18.8029
35.4361	32.2162	20.5317
24.8615	41.7603	38.6621
17.7403	71.6159	32.3502
