# Supplementary material for: The effects of Saccharomyces boulardii on rat colonic hypermotility induced by repeated water avoidance stress and the potential mechanism
Source: PeerJ. 2022 Nov 22;10:e14390. doi: 10.7717/peerj.14390 (PMC9695494; doi:10.7717/peerj.14390)
Supplement: Supplemental Information 3 [file peerj-10-14390-s003.xlsx]

## Sheet: colon tissue.IFN-γ
Sample number	Raw OD	Calibrated OD	Sample concentration（pg/ml）	Mean concentration	Final concentration（ng/g））				Original OD of standard	Standards calibration OD	Standard concentration (pg/ml)
① 1	0.087	0.024	21.5524	21.076	8.46343	① 1	2.49024		1.523	1.46	1500
	0.086	0.023	20.5995			① 2	1.5339		0.978	0.915	750
① 3	0.127	0.064	60.9481	59.9336	17.0079	① 3	3.52386		0.632	0.569	375
	0.125	0.062	58.919			① 4	1.1958		0.365	0.302	187.5
① 4	0.069	0.006	4.6393	4.17691	3.49298	① 5	3.2727		0.247	0.184	93.75
	0.068	0.005	3.71452			① 6	0.70314		0.164	0.101	46.88
① 5	0.077	0.014	12.0938	11.9531	3.65237	① 7	3.97788		0.114	0.051	23.44
	0.0767	0.0137	11.8125			① 8	5.62008		0.063	0	0
① 8	0.155	0.092	90.0114	88.9531	15.8277	① 9	1.66914
	0.153	0.09	87.8949			① 10	2.73174
① 9	0.094	0.031	28.2664	27.3033	16.3577	② 1	7.45548
	0.092	0.029	26.3403			② 2	2.97324
② 3	0.318	0.255	283.504	279.575	53.5171	② 3	5.22402
	0.312	0.249	275.646			② 4	3.57216
② 4	0.176	0.113	112.612	114.255	31.9847	② 5	3.42726
	0.179	0.116	115.897			② 6	2.84766
② 5	0.147	0.084	81.5827	83.6836	24.4171	② 7	3.16644
	0.151	0.088	85.7846			② 8	3.59148
② 6	0.141	0.078	75.3268	76.8872	27.0001	② 9	4.90524
	0.144	0.081	78.4477			② 10	3.26304
② 7	0.135	0.072	69.127	71.1905	22.4828	③ 1	2.49024
	0.139	0.076	73.2539			③ 2	4.0455
② 10	0.263	0.2	213.578	218.517	66.9672	③ 3	2.71242
	0.271	0.208	223.455			③ 4	2.17146
③ 1	0.134	0.071	68.0992	65.5413	26.3193	③ 5	3.34032
	0.129	0.066	62.9835			③ 6	2.60616
③ 2	0.13	0.067	64.0035	66.0514	16.3271	③ 7	3.35964
	0.134	0.071	68.0992			③ 8	3.97788
③ 3	0.102	0.039	36.0331	34.571	12.7454	③ 9	2.49024
	0.099	0.036	33.1089			③ 10	3.89094
③ 4	0.125	0.062	58.919	59.9336	27.6006				Note: Samples were diluted 2 times and results were multiplied by the dilution factor
	0.127	0.064	60.9481
③ 5	0.133	0.07	67.0729	65.0282	19.4677
	0.129	0.066	62.9835
③ 6	0.114	0.051	47.8705	46.3803	17.7964
	0.111	0.048	44.8901

## Sheet: IL-1β
Sample number	Raw OD	Calibrated OD	Sample concentration（pg/ml）	Mean concentration	Final concentration（ng/g））				Original OD of standard	Standards calibration OD	Standard concentration (pg/ml)
① 1	0.11	0.023	14.0856	13.5107	5.42544	① 1	2.49024		1.294	1.207	1000
	0.108	0.021	12.9357			① 3	3.52386		0.791	0.704	500
① 3	0.127	0.04	23.9289	24.2204	6.87325	① 4	1.1958		0.465	0.378	250
	0.128	0.041	24.5118			① 5	3.2727		0.281	0.194	125
① 4	0.1	0.013	8.35374	8.92519	7.46378	① 8	5.62008		0.193	0.106	62.5
	0.102	0.015	9.49664			① 9	1.66914		0.147	0.06	31.2
① 5	0.121	0.034	20.4405	21.3117	6.51195				0.112	0.025	15.6
	0.124	0.037	22.1828						0.087	0	0		Supplementary Image 2
① 8	0.129	0.042	25.0952	24.8035	4.41337
	0.128	0.041	24.5118
① 9	0.116	0.029	17.5454	18.4133	11.0316
	0.119	0.032	19.2812
② 3	0.359	0.272	170.751	171.093	32.7512	② 3	5.22402
	0.36	0.273	171.434			② 4	3.57216
② 4	0.407	0.32	204.034	203.331	56.9209	② 5	3.42726
	0.405	0.318	202.627			② 6	2.84766
② 5	0.455	0.368	238.313	238.675	69.6402	② 7	3.16644
	0.456	0.369	239.038			② 10	3.26304
② 6	0.235	0.148	89.3818	88.7529	31.167
	0.233	0.146	88.1239
② 7	0.316	0.229	141.781	142.779	45.0913
	0.319	0.232	143.777
② 10	0.298	0.211	129.892	130.878	40.1092
	0.301	0.214	131.864
③ 1	0.219	0.132	79.3669	79.6782	31.9962	③ 1	2.49024
	0.22	0.133	79.9896			③ 2	4.0455
③ 2	0.344	0.257	160.555	160.216	39.6036	③ 3	2.71242
	0.343	0.256	159.878			③ 4	2.17146
③ 3	0.24	0.153	92.5342	91.9031	33.8823	③ 5	3.34032
	0.238	0.151	91.272			③ 6	2.60616
③ 4	0.14	0.053	31.5405	30.9526	14.2543
	0.138	0.051	30.3647
③ 5	0.265	0.178	108.458	106.535	31.8937
	0.259	0.172	104.612
③ 6	0.117	0.03	18.1236	17.8345	6.84321
	0.116	0.029	17.5454

## Sheet: IL-6
Sample number	Raw OD	Calibrated OD	Sample concentration（pg/ml）	Mean concentration	Final concentration（ng/g））					Original OD of standard	Standards calibration OD	Standard concentration (pg/ml)
① 1	0.141	0.055	8.22572	8.08182	3.2454		① 1	2.49024		2.186	2.1	500
	0.139	0.053	7.93793							1.34	1.254	250
① 3	0.138	0.052	7.79417	8.00995	2.27306		① 3	3.52386		0.821	0.735	125
	0.141	0.055	8.22572							0.459	0.373	62.5
① 4	0.126	0.04	6.07649	6.00522	5.02193		① 4	1.1958		0.302	0.216	31.2
	0.125	0.039	5.93396							0.195	0.109	15.6
① 5	0.117	0.031	4.79714	4.93896	1.50914		① 5	3.2727		0.133	0.047	7.8
	0.119	0.033	5.08078							0.086	0	0
① 8	0.178	0.092	13.6179	13.5442	2.40997		① 8	5.62008
	0.177	0.091	13.4705
① 9	0.099	0.013	2.26137	2.12144	1.27098		① 9	1.66914
	0.097	0.011	1.98151
② 3	0.818	0.732	127.331	127.019	24.3145		② 3	5.22402
	0.815	0.729	126.708
② 4	1.095	1.009	188.531	189.117	52.9419		② 4	3.57216
	1.1	1.014	189.702
② 5	0.59	0.504	82.3887	84.2617	24.5857		② 5	3.42726
	0.61	0.524	86.1347
② 6	0.916	0.83	148.155	148.264	52.0652		② 6	2.84766
	0.917	0.831	148.372
② 7	0.684	0.598	100.323	100.031	31.5908		② 7	3.16644
	0.681	0.595	99.7379
② 10	0.764	0.678	116.243	116.345	35.6553		② 10	3.26304
	0.765	0.679	116.446
③ 1	0.314	0.228	34.548	34.9494	14.0345
	0.319	0.233	35.3508
③ 2	0.462	0.376	59.3079	59.0467	14.5957
	0.459	0.373	58.7855
③ 3	0.451	0.365	57.3966	57.9171	21.3526		③ 1	2.49024
	0.457	0.371	58.4377				③ 2	4.0455
③ 4	0.19	0.104	15.3945	14.8016	6.81641		③ 3	2.71242
	0.182	0.096	14.2086				③ 4	2.17146
③ 5	0.187	0.101	14.9491	14.3573	4.29817		③ 5	3.34032
	0.179	0.093	13.7655				③ 6	2.60616
③ 6	0.176	0.09	13.3232	15.1043	5.7956
	0.2	0.114	16.8854
③ 7	0.114	0.028	4.37239	8.33341
	0.169	0.083	12.2944
③ 8	0.098	0.012	2.12139	1.98156
	0.096	0.01	1.84172
③ 9	0.946	0.86	154.711	155.152
	0.95	0.864	155.592
③ 10	0.187	0.101	14.9491	14.3573
	0.179	0.093	13.7655

## Sheet: IL-10
Sample number	Raw OD	Calibrated OD	Sample concentration（pg/ml）	Mean concentration	Final concentration（ng/g）			Original OD of standard	Standards calibration OD	Standard concentration (pg/ml)
① 1	0.083	0.01	21.8518	25.0785	10.0707	① 1	2.49024	1.316	1.243	4000
	0.086	0.013	28.3053					0.789	0.716	2000
① 3	0.086	0.013	28.3053	26.1533	7.42176	① 3	3.52386	0.484	0.411	1000
	0.084	0.011	24.0012					0.286	0.213	500
① 4	0.077	0.004	8.99204	11.1318	9.3091	① 4	1.1958	0.192	0.119	250
	0.079	0.006	13.2716					0.131	0.058	125
① 5	0.091	0.018	39.0963	40.1781	12.2767	① 5	3.2727	0.093	0.02	62.5
	0.092	0.019	41.2598					0.073	0	0
① 8	0.101	0.028	60.81	62.9919	11.2084	① 8	5.62008
	0.103	0.03	65.1738
① 9	0.079	0.006	13.2716	15.4149	9.23522	① 9	1.66914
	0.081	0.008	17.5582
② 3	0.088	0.015	32.6165	31.5382	6.03716	② 3	5.22402
	0.087	0.014	30.46
② 4	0.085	0.012	26.1524	29.3844	8.22595	② 4	3.57216
	0.088	0.015	32.6165
② 5	0.091	0.018	39.0963	33.7008	9.83317	② 5	3.42726
	0.086	0.013	28.3053
② 6	0.089	0.016	34.7747	28.3132	9.94262	② 6	2.84766
	0.083	0.01	21.8518
② 7	0.086	0.013	28.3053	25.0785	7.9201	② 7	3.16644
	0.083	0.01	21.8518
② 10	0.084	0.011	24.0012	26.1533	8.015	② 10	3.26304
	0.086	0.013	28.3053
③ 1	0.085	0.012	26.1524	24.0021	9.63846	③ 1	2.49024
	0.083	0.01	21.8518
③ 2	0.091	0.018	39.0963	41.2607	10.1992	③ 2	4.0455
	0.093	0.02	43.425
③ 3	0.087	0.014	30.46	32.6173	12.0252	③ 3	2.71242
	0.089	0.016	34.7747
③ 4	0.084	0.011	24.0012	27.2306	12.5402	③ 4	2.17146
	0.087	0.014	30.46
③ 5	0.092	0.019	41.2598	33.7061	10.0907	③ 5	3.34032
	0.085	0.012	26.1524
③ 6	0.086	0.013	28.3053	25.0785	9.62279	③ 6	2.60616
	0.083	0.01	21.8518

## Sheet: Protein concentration
Sample number	Raw OD	Calibrated OD	Sample concentration（pg/ml）	Mean concentration	Final concentration（ng/g））
① 1	0.388	0.264	2.49024
① 3	0.495	0.371	3.52386
① 4	0.254	0.13	1.1958
① 5	0.469	0.345	3.2727			Original OD of standard	Standards calibration OD	Standard concentration (pg/ml)
① 8	0.712	0.588	5.62008			1.195	1.071	0.5
① 9	0.303	0.179	1.66914			0.951	0.827	0.4
						0.701	0.577	0.3
② 3	0.671	0.547	5.22402			0.536	0.412	0.2
② 4	0.5	0.376	3.57216			0.356	0.232	0.1
② 5	0.485	0.361	3.42726			0.25	0.126	0.05
② 6	0.425	0.301	2.84766			0.194	0.07	0.025
② 7	0.458	0.334	3.16644			0.124	0	0
② 10	0.468	0.344	3.26304
③ 1	0.388	0.264	2.49024
③ 2	0.549	0.425	4.0455
③ 3	0.411	0.287	2.71242
③ 4	0.355	0.231	2.17146
③ 5	0.476	0.352	3.34032
③ 6	0.4	0.276	2.60616
						Note: Samples were homogenised at 10% and diluted 20 times for testing, results have been multiplied by the dilution factor
